# Supplementary material
Source: PubMed Central journal article supplement (PMC6527179)
Supplement: supp_RA118.006059_141061_2_supp_306530_pp002y.pdf [file supp_RA118.006059_141061_2_supp_306530_pp002y.pdf]

Supporting Information for

**High-resolution structure of RGS17 suggests a role for  $Ca^{2+}$  in promoting the GAP activity by RZ subfamily members**

**Monita Sieng<sup>1</sup>, Michael P. Hayes<sup>3</sup>, Joseph B. O'Brien<sup>3</sup>, C. Andrew Fowler<sup>4</sup>, Jon C. Houtman<sup>5</sup>,  
David L. Roman<sup>3</sup>, Angeline M. Lyon<sup>1,2</sup>**

From the Departments of Chemistry<sup>1</sup> and Biological Sciences<sup>2</sup>, Purdue University, West Lafayette, IN 47907 and the Department of Pharmaceutical Sciences and Experimental Therapeutics, College of Pharmacy<sup>3</sup> and NMR Facility, Roy J. and Lucille A. Carver College of Medicine<sup>4</sup>, Department of Microbiology & Immunology<sup>5</sup>, University of Iowa, Iowa City, IA 52242

Running title: *Regulation of RGS17 by  $Ca^{2+}$*

To whom correspondence should be addressed: Angeline M. Lyon, Departments of Chemistry and Biological Sciences, Purdue University, 560 Oval Drive, West Lafayette, Indiana 47907, Telephone: (765) 494-5291; email: [lyonam@purdue.edu](mailto:lyonam@purdue.edu)

**Supporting Table 1. Thermal Stability of RGS17**

|               | <b>RGS17</b><br>( $T_m \pm \text{SEM}$ ) | <b>+ CaCl<sub>2</sub></b><br>( $T_m \pm \text{SEM}$ ) | <b>+ MgCl<sub>2</sub></b><br>( $T_m \pm \text{SEM}$ ) |
|---------------|------------------------------------------|-------------------------------------------------------|-------------------------------------------------------|
| protein only  | 55.3 $\pm$ 0.346                         |                                                       |                                                       |
| + 200 nM      |                                          | 56.1 $\pm$ 0.63                                       | 58.3 $\pm$ 0.870                                      |
| + 2 $\mu$ M   |                                          | 58.0 $\pm$ 1.14                                       | 56.9 $\pm$ 0.80                                       |
| + 20 $\mu$ M  |                                          | 56.3 $\pm$ 1.07                                       | 56.1 $\pm$ 1.05                                       |
| + 200 $\mu$ M |                                          | 58.2 $\pm$ 1.21                                       | 57.9 $\pm$ 1.07                                       |
| + 2 mM        |                                          | 57.3 $\pm$ 0.566                                      | 59.5 $\pm$ 1.44                                       |
| + 20 mM       |                                          | 51.7 $\pm$ 0.189                                      | 55.5 $\pm$ 1.07                                       |

Data represents at least three independent experiments performed in triplicate.

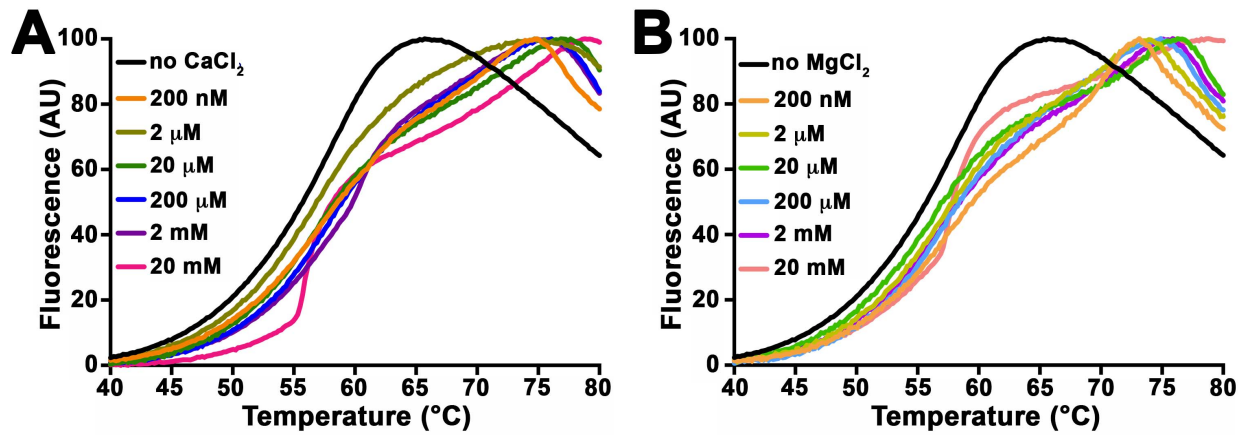

**Supporting Figure 1. RGS17 is not significantly thermally stabilized by the addition of CaCl<sub>2</sub> or MgCl<sub>2</sub>.** Differential scanning fluorimetry (DSF) was used to determine whether the binding of Ca<sup>2+</sup> or Mg<sup>2+</sup> perturbed the melting temperature (T<sub>m</sub>) of RGS17. RGS17 was incubated with a fluorescent dye and increasing concentrations of CaCl<sub>2</sub> or MgCl<sub>2</sub>, and the sample heated. As RGS17 denatures, the dye fluoresces, and the inflection point of the curve corresponds to the T<sub>m</sub> (43).

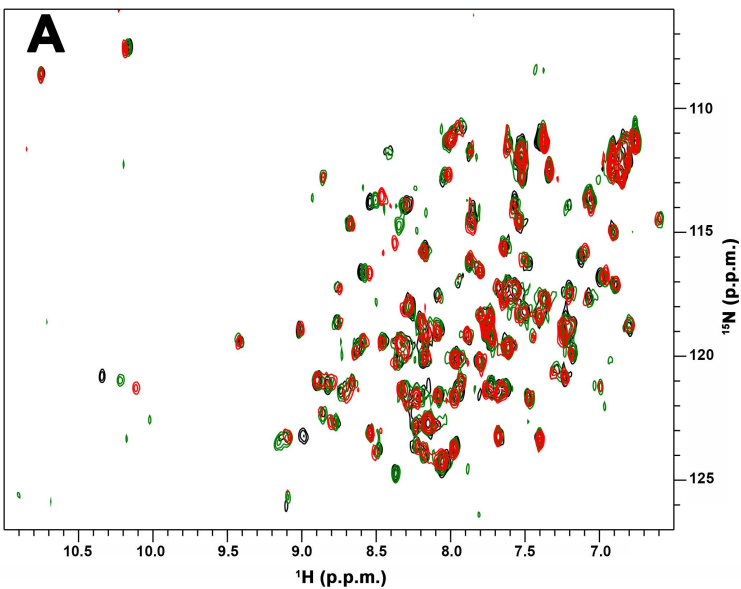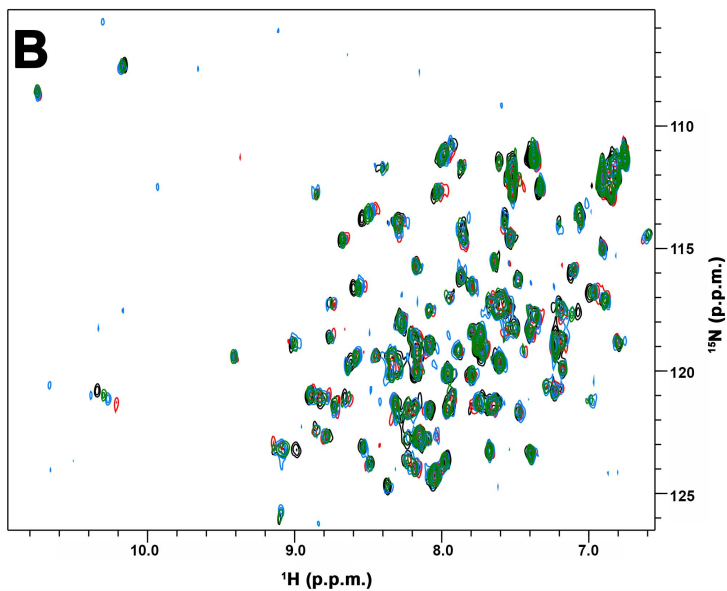

**Supporting Figure 2.  $^1\text{H}$ - $^{15}\text{N}$  spectra of RGS2 in the presence of  $\text{CaCl}_2$  or  $\text{MgCl}_2$ .** (A)  $^1\text{H}$ - $^{15}\text{N}$  2D HSQC spectra of RGS2 alone (black) and upon addition of 20 (green) or 250 molar excess of  $\text{CaCl}_2$  (red). (B)  $^1\text{H}$ - $^{15}\text{N}$  2D HSQC spectra of RGS2 alone (black) and upon addition of 100 (green), 250 (blue), or 500 molar excess  $\text{MgCl}_2$  (red).

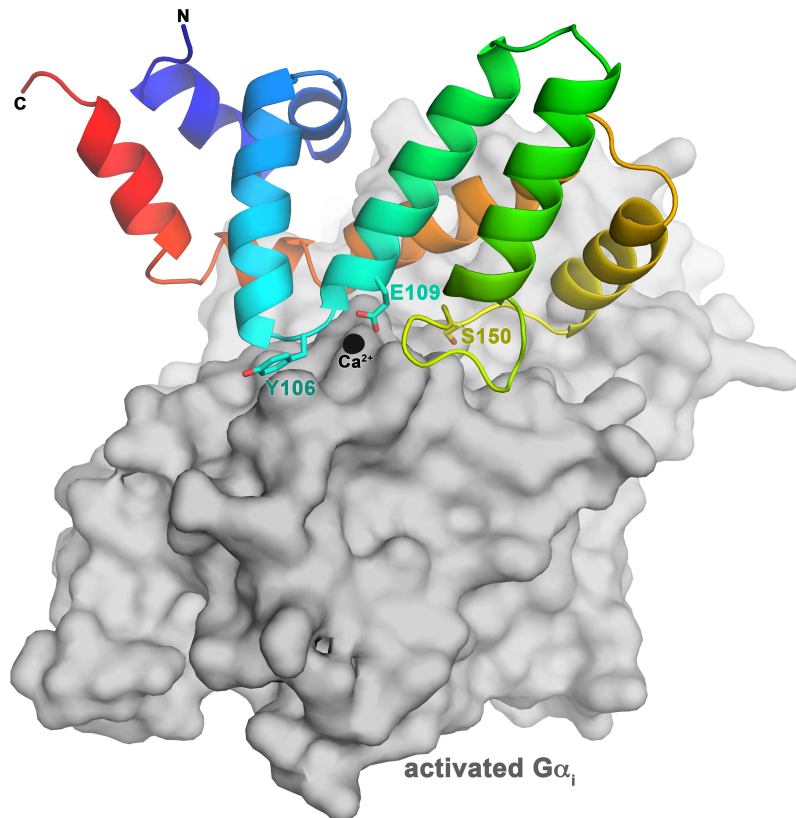

**Supporting Figure 3. Model of RGS17 bound to activated Gα<sub>i</sub>.** RGS17 is proposed to bind to the switch regions of Gα subunits to promote GTP hydrolysis, based on superposition of RGS17 with RGS4 in its complex with activated Gα<sub>i</sub> (PDB ID 1AG4) (6). Ser150 is required for GAP activity, and is equivalent to Asn128 in RGS4 (9). Tyr106 and Glu109 coordinate a Ca<sup>2+</sup> ion (shown as a black sphere) in the structure of RGS17, and are located on the predicted Gα<sub>i</sub> binding surface. RGS17 is shown color-ramped from blue at the N-terminus to red at the C-terminus, and activated Gα<sub>i</sub> is shown as a gray surface.
